# Supplementary material
Source: PubMed Central journal article supplement (PMC2840420)
Supplement: 0914658107_pnas.200914658SI.pdf [file 0914658107_pnas.200914658SI.pdf]

# Supporting Information

Swan et al. 10.1073/pnas.0914658107

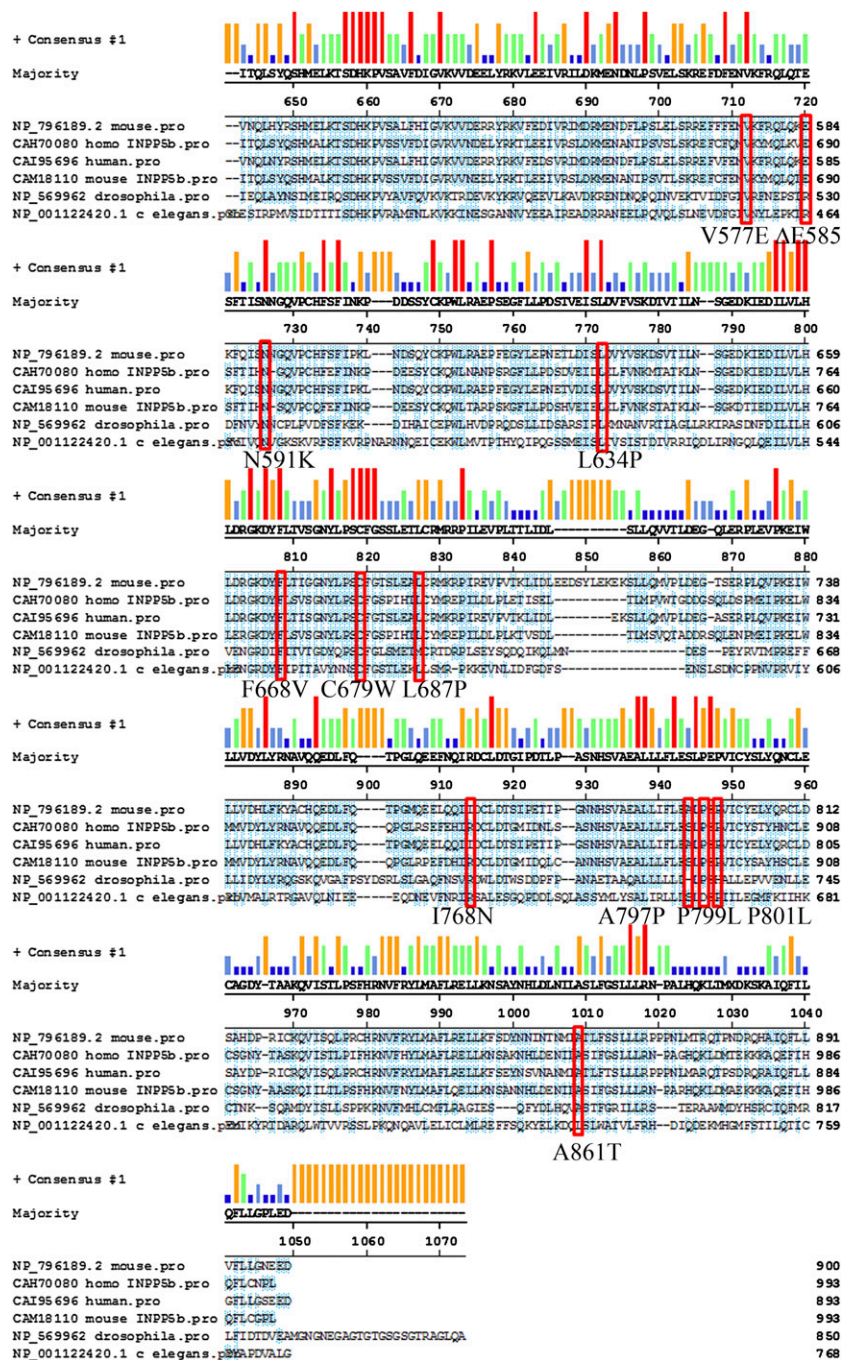

Fig. S1. Conservation of the ASH-RhoGAP-like module of OCRL and INPP5b. Boxed residues are mutations examined in this study (Fig. 4 and Fig. S2).

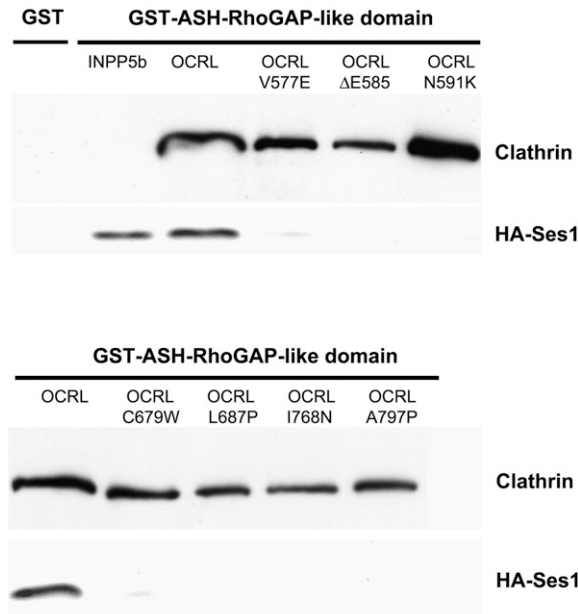

**Fig. S2.** Western blots of GST pull-downs from extracts of HA-Ses1-transfected Cos7 cells showing that HA-Ses1 binds to the ASH-RhoGAP-like domains of WT OCRL and INPP5b but not to GST or to the mutant ASH-RhoGAP-like domains of OCRL harboring the patient mutations V577E,  $\Delta$ E585, N591K, C679W, L687P, I768N, and A797P. All these mutations were shown previously to abolish APPL1 binding (1, 2). Clathrin heavy chain specifically binds the OCRL ASH-RhoGAP-like domain and not INPP5B or GST alone, as expected (1).

1. Erdmann KS, et al. (2007) A role of the Lowe syndrome protein OCRL in early steps of the endocytic pathway. *Dev Cell* 13:377–390.
2. McCrea HJ, et al. (2008) All known patient mutations in the ASH-RhoGAP domains of OCRL affect targeting and APPL1 binding. *Biochem Biophys Res Commun* 369:493–499.

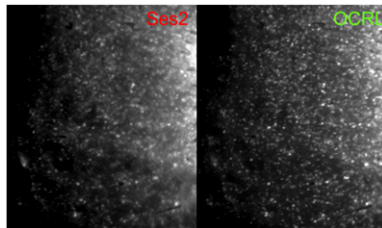

**Fig. S3.** tagRFP-t-Ses2 and GFP-OCRL colocalize on endosomal structures. Widefield microscopy. Magnification is 63 $\times$ .

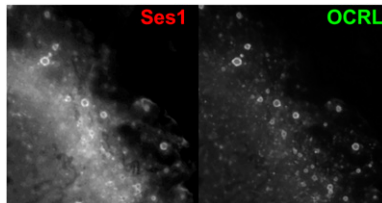

**Fig. S4.** GFP-OCRL and tagRFP-t-Ses1 colocalize on macropinosomes generated by overexpression of Hras<sup>V12G</sup>. Widefield image from live cells. Magnification is 63 $\times$ .

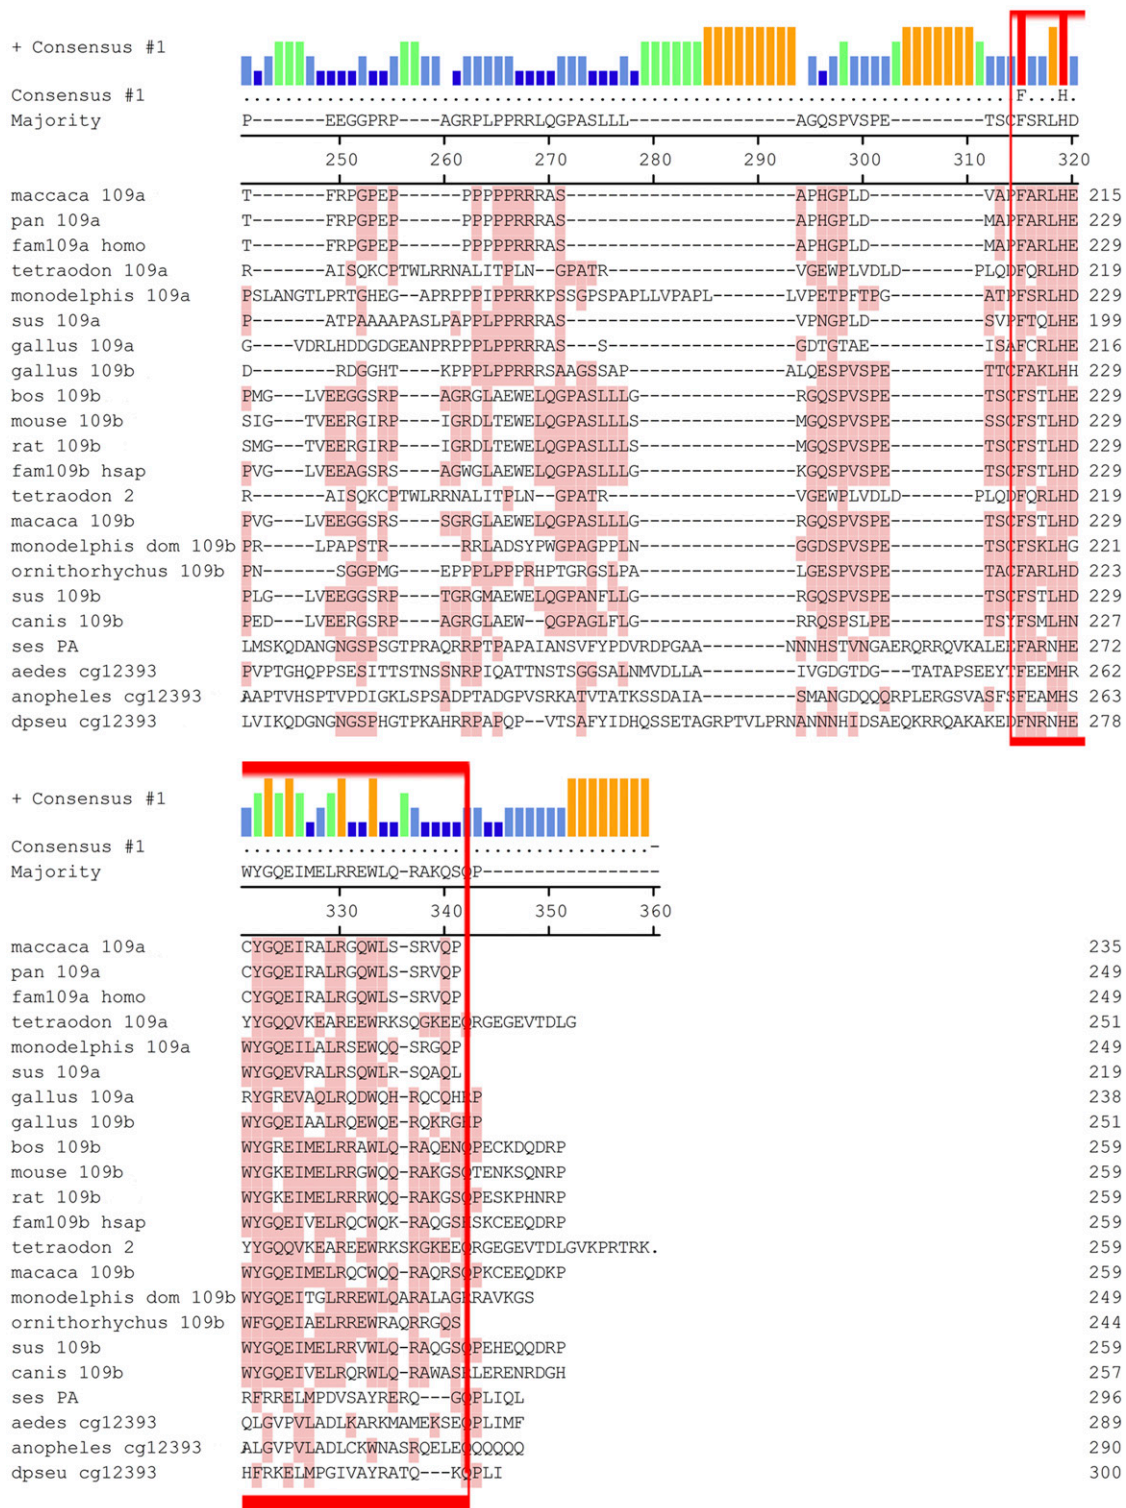

Fig. S5. Conservation of a region of homology in Ses1/Fam109a, Ses2/Fam109b, and invertebrate DSes/CG12393. The C-terminal region of Ses-like proteins is poorly conserved apart from the heavily conserved F-x-x-x-H motif (F&H) at or near the C terminus (red box).

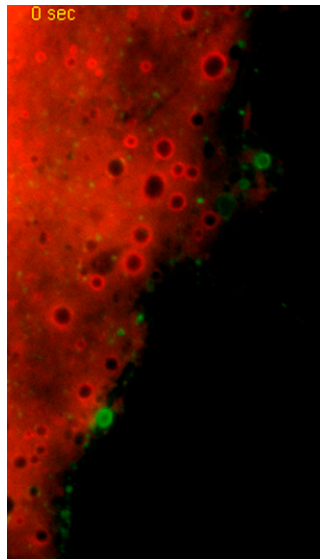

**Movie S1.** A 0.2-Hz widefield microscopy movie of a Cos7 cell transfected with OCRL, TagRFP-T-Ses2, and GFP-APPL1. Spontaneously generated macropinosomes are initially APPL1 positive and then shed this protein. Some of them acquire Ses2 upon shedding APPL1.

[Movie S1](#)

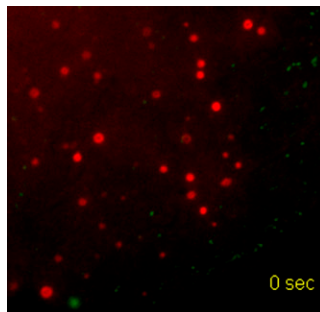

**Movie S2.** A 0.2-Hz widefield microscopy movie of a Cos7 cell transfected with OCRL, TagRFP-T-Ses2, and GFP-APPL1. Spontaneously generated Ses2-positive macropinosomes shed Ses2 and acquire APPL1 on treatment (wortmannin) with the PI3'-kinase inhibitor wortmannin.

[Movie S2](#)
